# Supplementary material
Source: publisher figshare collection journal article supplement (https://tandf.figshare.com/ndownloader/files/22116795)
Supplement: Supplementary file 1 [file 22116795]

**Supplementary material**

**Table S1: Cost breakdown for RFA treatment**

| Consumable | Unit cost | Source |
| --- | --- | --- |
| **RAF BarrX Kit** | |  |
| RFA- BarrX Halo - 90/60 Focal | £1,150 | Client list price (33.3% of patients, 56 minute procedure) |
| RFA-BarrX Halo - 90 Ultra | £1,400 | Client list price (33.3% of patients, 49 minute procedure) |
| RFA- BarrX Halo - TTS | £1,400 | Client list price (33.3% of patients, 68 minute procedure) |
| **Procedure Consumables** | |  |
| Venflon needle | £0.90 | Royal Marsden Costing Audit (from MdT) |
| Dressing Tegaderm | £8.90 | Royal Marsden Costing Audit (from MdT) |
| 20ml Syringe | £0.66 | Royal Marsden Costing Audit (from MdT) |
| Spray Catheter | £3.50 | Royal Marsden Costing Audit (from MdT) |
| 10ml NACysteine | £2.90 | Royal Marsden Costing Audit (from MdT) |
| Bite Block | £1.70 | Royal Marsden Costing Audit (from MdT) |
| Suction Tube | £4.90 | Royal Marsden Costing Audit (from MdT) |
| 50ml Syringe | £0.75 | Royal Marsden Costing Audit (from MdT) |
| **Local Anaesthetic Consumable** | |  |
| Fentanyl (2 ml/100µg) 100 µg | £1.43 | BNF 2019 [2] |
| Midazolam | £1.02 | BNF 2019 [2] |
| Fluid 1 litre e.g. hartmanns (1000 ml) | £0.85, inflated to £0.89 | Clinical Guidleline 174. Table 36, Appendix N [3]. Inflated using PSSRU index [4] |
| Xylocaine spray (10mg, size 50ml) | £0.25 | BNF 2019 [2] EMC [5] |
| **Staffing (per procedure)** | **Mean (per minute)** | **Source** |
| Consultant Endoscopist | £1.80 | PSSRU 2018 14. Hospital-based doctors Consultant: surgical (£108 per working hour) [4] |
| ODP (Band 5) | £0.62 | PSSRU 2018 - Hospital-based nurse band 5 £37 an hour [4] |
| Band 2/3 | £0.42 | PSSRU 2017 14.5 Clinical support worker (hospital) band 3 nurse (£25 per working hour) [4] |
| Band 6 | £0.75 | PSSRU 2018 Hospital-based nurse - Band 6 £45 per hour [4] |
| Recovery on Day case Ward - Band 6 | £0.75 | PSSRU 2018 Hospital-based nurse - Band 6 £45 per hour [4] |
| Endoscopy running cost | £8.50 | Royal Marsden Costing Audit (from MdT) |

[2] National Institute for Health and Care Excellence (NICE). British National Formulary; 2019. https://bnf.nice.org.uk/

[3] National Institute for Health and Care Excellence (NICE). Intravenous Fluid Therapy: Intravenous Fluid Therapy in Adults in Hospital. In: NICE Clinical Guidelines, No. 174.

London: Royal College of Physicians (UK); 2013 Dec.

[4] University of Kent. Unit Costs of Health and Social Care 2018. 2018. https://www.pssru.ac.uk/project-pages/unit-costs/unit-costs-2018/

[5] EMC. Xylocaine 10mg spray. https://www.medicines.org.uk/emc/product/882/pil

**Figure S1: Probabilistic sensitivity analysis plot**
